# Supplementary material for: Mineral physical protection and carbon stabilization in-situ evidence revealed by nano scale 3-D tomography
Source: Copernicus journal article supplement (doi:10.5194/bg-2017-509), 2017-12-21
Supplement: Supplementary file 1 [file bg-2017-509-supplement.pdf]

1 **Supplementary Information**

2 **Mineral physical protection and carbon stabilization in-situ**  
3 **evidence revealed by nano scale 3-D tomography**

4 Yi-Tse Weng<sup>1,#</sup>, Chun-Chieh Wang<sup>2,#</sup>, Cheng-Cheng Chiang<sup>2</sup>, Heng Tsai<sup>3</sup>, Yen-  
5 Fang Song<sup>2</sup>, Shih-Tsuen Huang<sup>4</sup>, Biqing Liang<sup>1,\*</sup>

6 <sup>1</sup>National Cheng Kung University, Department of Earth Sciences, Tainan,  
7 Taiwan ROC

8 <sup>2</sup>National Synchrotron Resource Research Center, Hsinchu, Taiwan ROC

9 <sup>3</sup>National Changhua University of Education, Department of Geography,  
10 Changhua, Taiwan ROC

11 <sup>4</sup>National Taichung University of Education, Department of Science Education  
12 and Application, Taichung, Taiwan ROC

13 #Equal Contribution

14 \*Corresponding author: Biqing Liang

15 (liangglobalcarbon@gmail.com; liangbq@mail.ncku.edu.tw)

16

17 **3-D tomography computation and illustration**

18 The final 3-D tomographic structures for visualization and illustration are  
19 generated using *Amira* 3-D software for post-image processing (Fig. 1). The

1 reconstructed datasets first go through *Median* and *Gauss* filter processes to  
2 enhance the S/N ratio before 3-D computation. In order to eliminate the noise  
3 surrounding the reconstructed datasets, the *LabelField* function is used to  
4 define a 3-D mask for specimens of interest. The *Arithmetic* function is used to  
5 segment the specimens from surrounding noise according to the 3-D mask.  
6 After the above post-image processing, the dataset is illustrated using *Voltex*  
7 and *Isosurface*. In general, OC is demonstrated by *Voltex* in proper contrast  
8 value, and minerals and gold particles with high intensity are shown by  
9 *Isosurface* with a reasonable threshold. Organic C and minerals are bound in  
10 the specific spatial region using *SelectRoi*. The *CameraRotate* module is used  
11 to show the rotating motion of tomography along a specific axis. The internal  
12 structure of specimen is shown under the *clippingPlane* module. The  
13 *DemoMaker* module is applied to make an animated sequence of operations  
14 for advanced movie recording, and *MovieMaker* is used to export the animated  
15 operation to video file.  
16

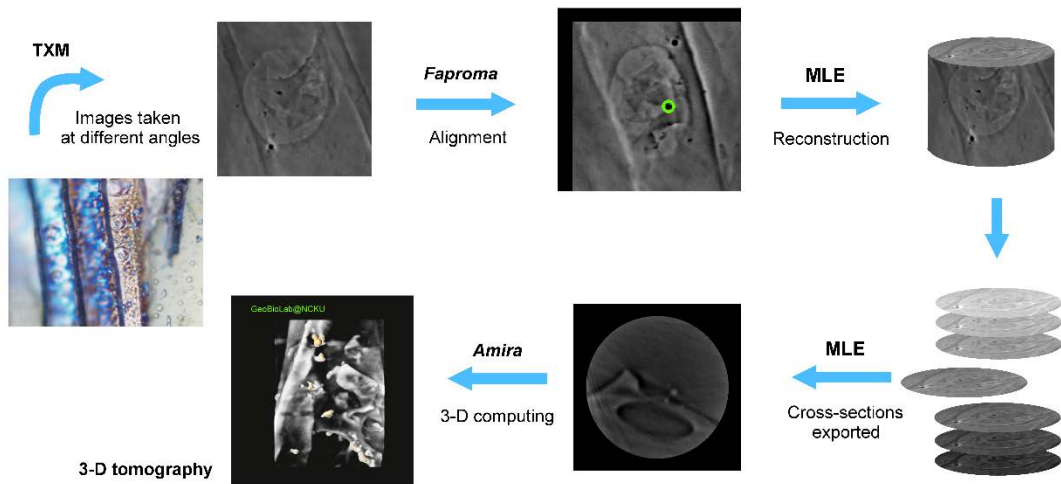

1

2 **Figure S1.** The flowchart for 3-D tomography reconstruction and subsequent

3 3-D computation for illustration using TXM. Reconstructed 3-D tomography

4 datasets are generated based on measured distribution. And 3-D tomography

5 illustration is generated by image post-process and computation.

6

7

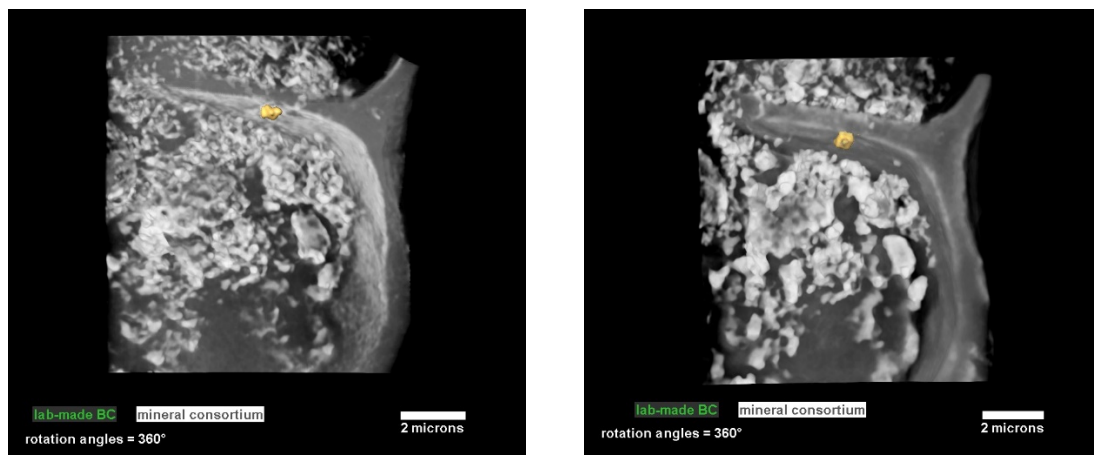

8

9 **Figure SMOV1.** Video illustration extracted from 3-D absorption contrast

10 tomography of lab-made BC and mineral nano particle consortium. Yellow

11 particle is a gold nano particle for position reference. All minerals are shown in

12 silver color. The dark grey part contours the structure and boundary of OC.

13 <https://drive.google.com/open?id=1FD-ui0-lsr4U2eCl6X2AbwqtCuChtll>

1 **Figure SMOV2.** Video illustration extracted from 3-D phase contrast  
2 tomography of lab-made BC and mineral nano particle consortium. Yellow  
3 particle is a gold nano particle for position reference. All minerals are shown in  
4 silver color. The dark grey part contours the structure and boundary of OC.

5 <https://drive.google.com/open?id=1RglvAplyXrnZTIZQyr7aGTo8vYGbkCJu>

6  
7

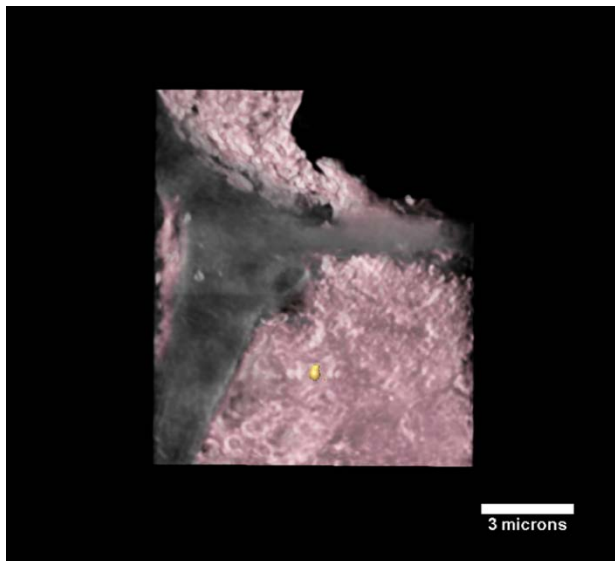

8

9 **Figure SMOV3.** Video illustration obtained from 3-D absorption contrast  
10 tomography of high mountain mineral bearing OC. Yellow particle is a gold  
11 nano particle for position reference. All minerals are shown in rust color. The  
12 dark grey part contours the structure and boundary of OC.

13 <https://drive.google.com/open?id=1-9KHc3SpncXfufIMy9IQ8V0AIVmB8d>

14

1 **Table S1.** XRD peak positions of mineral-bearing OC sample from Mt.  
 2 Nanhua.

|               | <b>d (Å)</b> | <b>d-reference (Å)</b> | <b>hkl</b> |
|---------------|--------------|------------------------|------------|
| Ferrihydrite  | 2.5644       | 2.5634                 | 100        |
|               | 2.2502       | 2.2504                 | 012        |
|               | 2.0046       | 1.9840                 | 013        |
|               | 1.7344       | 1.7322                 | 014        |
|               | 1.5090       | 1.5160                 | 015        |
|               | 1.4779       | 1.4800                 | 110        |
| Goethite      | 4.9831       | 5.0000                 | 020        |
|               | 4.2063       | 4.2089                 | 110        |
|               | 2.6992       | 2.7071                 | 130        |
|               | 2.5914       | 2.5913                 | 021        |
|               | 2.4595       | 2.4591                 | 111        |
|               | 2.2625       | 2.2624                 | 121        |
|               | 1.7210       | 1.7284                 | 221        |
|               | 1.6990       | 1.7005                 | 240        |
|               | 1.5650       | 1.5706                 | 151        |
| 1.5135        | 1.5150       | 002                    |            |
| Lepidocrocite | 6.2651       | 6.2700                 | 200        |
|               | 3.2921       | 3.2940                 | 210        |
|               | 2.4747       | 2.4730                 | 301        |
|               | 2.4333       | 2.4340                 | 410        |
|               | 2.3616       | 2.3620                 | 111        |
|               | 1.9402       | 1.9400                 | 501        |
|               | 1.9370       | 1.9350                 | 020        |
|               | 1.7367       | 1.7350                 | 511        |
|               | 1.5333       | 1.5340                 | 002        |
|               | 1.5258       | 1.5240                 | 321        |
| 1.3684        | 1.3710       | 521                    |            |
| Quartz        | 4.2532       | 4.254                  | 100        |
|               | 3.3422       | 3.342                  | 101        |
|               | 2.4571       | 2.456                  | 110        |
|               | 2.2806       | 2.280                  | 102        |
|               | 2.2361       | 2.236                  | 111        |
|               | 1.9788       | 1.979                  | 201        |
|               | 1.8173       | 1.817                  | 112        |
| 1.6715        | 1.671        | 202                    |            |

1.5412

1.541

211

1.3818

1.374

203

---

1

2

3

4

5

6

7

8

9

10

11

12

13

14

15

16

17

18

19

20

21

22

23

24

25

26

27

28

29

30

31

32

33

34

35

36

1 **Table S2.** FTIR peak assignment of mineral-bearing OC sample from Mt.  
 2 Nanhua.

| <b>Wavenumber<br/>(cm<sup>-1</sup>)</b> | <b>Model</b>                                   | <b>Reference</b>                  | <b>Ref.<br/>value</b> |
|-----------------------------------------|------------------------------------------------|-----------------------------------|-----------------------|
| <b>1758</b>                             | Carbonyl C=O stretching                        | Parikh et al., 2014               | 1765                  |
| <b>1706</b>                             | Aromatic carbonyl/carboxyl C=O stretching      | Özçimen and Ersoy-Meriçboyu, 2010 | 1709                  |
| <b>1596</b>                             | vC=C in aromatic                               | Sharma et al., 2004               | 1597                  |
| <b>1454</b>                             | CH deformation and aromatic ring vibrations    | Sharma et al., 2004               | 1460                  |
| <b>1386</b>                             | Carboxyl C–O symmetric stretching              | Parikh et al., 2014               | 1384                  |
| <b>1274</b>                             | Carboxyl C–O stretching                        | Parikh et al., 2014               | 1280                  |
| <b>1247</b>                             | v(C-O) phenolic                                | Parikh et al., 2014               | 1240                  |
| <b>1113</b>                             | Si–O stretching                                | Vaculikova et al., 2011           | 1113                  |
| <b>1062</b>                             | Si–O stretching                                | Harsh et al., 2002                | 1060                  |
| <b>1025</b>                             | Aliphatic ether C–O and alcohol C–O stretching | Parikh et al., 2014               | 1029                  |
| <b>910</b>                              | OH deformation                                 | Vaculikova et al., 2011           | 913                   |
| <b>875</b>                              | 1 adjacent H deformations                      | Parikh et al., 2014               | 870                   |
| <b>798</b>                              | 2 adjacent H deformations                      | Parikh et al., 2014               | 804                   |
| <b>754</b>                              | 4 adjacent H deformations                      | Parikh et al., 2014               | 750                   |
| <b>694</b>                              | Fe-OH stretching                               | Blanch et al. 2008                | 690                   |
| <b>674</b>                              | In-plane O-H bend                              | Blanch et al. 2008                | 670                   |
| <b>626</b>                              | Fe–O stretching                                | Blanch et al. 2008                | 633                   |
| <b>534</b>                              | Fe-OH stretching                               | Blanch et al. 2008                | 533                   |
| <b>497</b>                              | Fe–O asymmetric stretching                     | Blanch et al. 2008                | 497                   |
| <b>476</b>                              | Fe-O vibrations                                | Parikh et al., 2014               | 480                   |

3 (Blanch et al., 2008; Harsh et al., 2002; Özçimen and Ersoy-Meriçboyu, 2010;

1 Parikh et al., 2014; Sharma et al., 2004; Vaculíková et al., 2011)

2

### 3 **References**

4 Blanch, A., Quinton, J., Lenehan, C., and Pring, A.: The crystal chemistry of

5 Al-bearing goethites: An infrared spectroscopic study, *Mineral. Mag*, 72,

6 1043-1056, 2008.

7 Harsh, J., Chorover, J., and Nizeyimana, E.: Allophane and Imogolite, In *Soil*

8 *Mineralogy with Environmental Applications*, SSSA Book Series No. 7,

9 Edited by: Dixon, J.B. and Schulze, D.G., Madison, WI: SSSA, pp 291–322,

10 2002.

11 Özçimen, D. and Ersoy-Meriçboyu, A.: Characterization of biochar and bio-oil

12 samples obtained from carbonization of various biomass materials,

13 *Renew. Energy*, 35, 1319-1324, 2010.

14 Parikh, S., W. Goynes, K., Margenot, A., Mukome, F., and J. Calderon, F.: *Soil*

15 *Chemical Insights Provided through Vibrational Spectroscopy*, Elsevier,

16 Oxford, pp 1–148, 2014.

17 Sharma, R. K., Wooten, J. B., Baliga, V. L., Lin, X., Geoffrey Chan, W., and

18 Hajaligol, M. R.: Characterization of chars from pyrolysis of lignin, *Fuel*,

19 83, 1469-1482, 2004.

20 Vaculíková, L., Plevová, E., Vallová, S., and Koutník, I.: Characterization and

21 differentiation of kaolinites from selected Czech deposits using infrared

22 spectroscopy and differential thermal analysis, *Acta Geodyn. Geomater.*,

23 8, 59–67. 2011.

24
